# Supplementary material for: White matter network of oral word reading identified by network-based lesion-symptom mapping
Source: PubMed Central journal article supplement — iScience. 2021 Jul 16;24(8):102862. doi: 10.1016/j.isci.2021.102862 (PMC8346667; doi:10.1016/j.isci.2021.102862), 2021-07-16
Supplement: mmc1.pdf [file mmc1.pdf]

**iScience, Volume 24**

**Supplemental information**

**White matter network of oral word  
reading identified by network-based  
lesion-symptom mapping**

**Mingyang Li, Luping Song, Yumei Zhang, and Zaizhu Han**

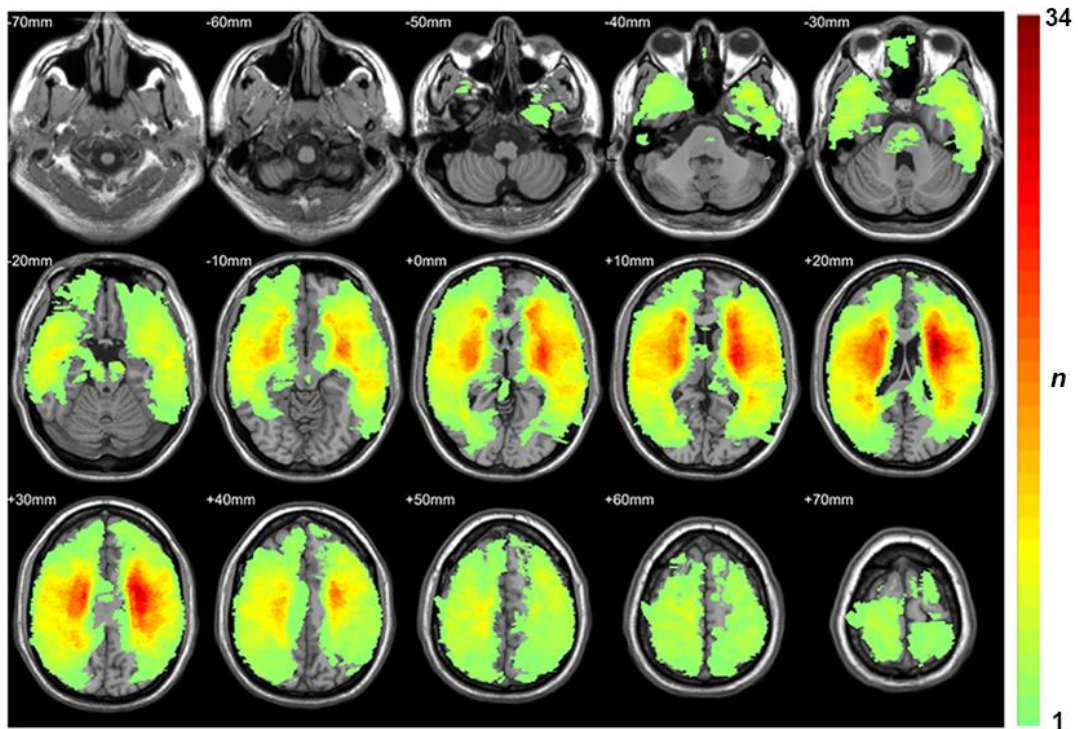

Supplemental Figure 1. Lesion overlap map of the 84 patients (the  $n$  value of each voxel denotes the number of patients with lesion). Related to Figure 2

(A) Reading-relevant regions obtained by the RLSM

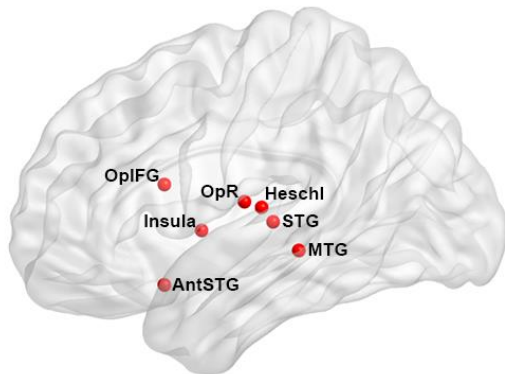

(B) Reading-relevant tracts obtained by the TLSM

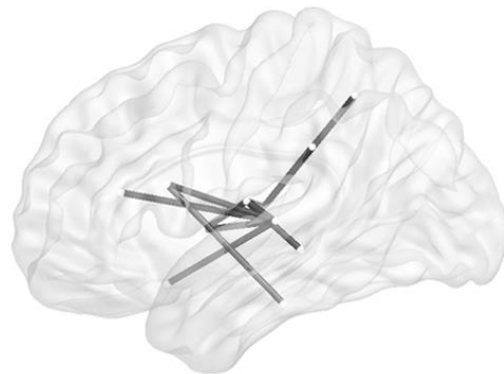

**Supplemental Figure 2. Reading subnetworks obtained by different methods. Related to STAR Methods**

Abbreviations: MTG: middle temporal gyrus; STG: superior temporal gyrus; OpR: rolandic operculum; AntSTG: anterior superior temporal gyrus; OpIFG: operculum inferior frontal gyrus; RLSM: region-based lesion-symptom mapping; TLSM: tract-based lesion-symptom mapping.

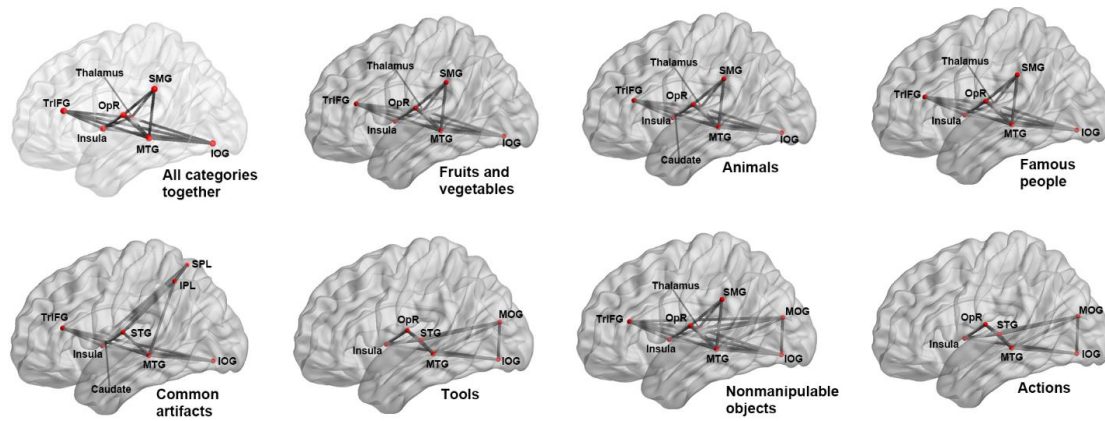

**Supplemental Figure 3. Reading networks identified by network-based lesion symptom mapping (NLSM) for collapsing all categories together and each individual category. Related to Figure 3**

Abbreviations: IOG: inferior occipital gyrus; MTG: middle temporal gyrus; SMG: supramarginal gyrus; TriFG: triangular inferior frontal gyrus; MOG: middle occipital gyrus; OpR: Rolandic operculum; STG: superior temporal gyrus; IPL: inferior parietal lobe; SPL: superior parietal lobe).

**Supplemental Table 1. Results of RLSM and TLSM. Related to STAR Methods**

| <b>Regions or tracts having significant effects</b> | <b><i>r</i> value of lesion-behavior correlation</b> | <b>Corrected <i>p</i> value</b> |
|-----------------------------------------------------|------------------------------------------------------|---------------------------------|
| <b>Region-based lesion-symptom mapping (RLSM)</b>   |                                                      |                                 |
| Left insula                                         | -0.58                                                | 7.84×10 <sup>-7</sup>           |
| Left MTG                                            | -0.56                                                | 2.21×10 <sup>-6</sup>           |
| Left STG                                            | -0.55                                                | 4.70×10 <sup>-6</sup>           |
| Left Heschl                                         | -0.52                                                | 4.01×10 <sup>-5</sup>           |
| Left OpR                                            | -0.51                                                | 5.62×10 <sup>-5</sup>           |
| Left OpIFG                                          | -0.42                                                | 5.74×10 <sup>-3</sup>           |
| Left antSTG                                         | -0.42                                                | 6.34×10 <sup>-3</sup>           |
| <b>Tract-based lesion-symptom mapping (TLSM)</b>    |                                                      |                                 |
| Left TrIFG - Left STG                               | 0.58                                                 | 7.73×10 <sup>-6</sup>           |
| Left insula - Left STG                              | 0.56                                                 | 2.18×10 <sup>-5</sup>           |
| Left OpR - Left MTG                                 | 0.55                                                 | 7.41×10 <sup>-5</sup>           |
| Left STG - Left AntSTG                              | 0.55                                                 | 7.91×10 <sup>-5</sup>           |
| Left OpR- Left STG                                  | 0.53                                                 | 1.61×10 <sup>-4</sup>           |
| Left OpIFG - Left ITG                               | 0.53                                                 | 2.57×10 <sup>-4</sup>           |
| Left SMG - Left thalamus                            | 0.52                                                 | 3.59×10 <sup>-4</sup>           |
| Left OpIFG - Left STG                               | 0.51                                                 | 7.20×10 <sup>-4</sup>           |
| Left OpR - Left thalamus                            | 0.49                                                 | 1.73×10 <sup>-3</sup>           |
| Left IPL - Left thalamus                            | 0.47                                                 | 7.97×10 <sup>-3</sup>           |
| Left OpR - Left putamen                             | 0.46                                                 | 9.61×10 <sup>-3</sup>           |

Note: The full name of each region is provided in Table S4.

**Supplemental Table 2. The regions in reading networks identified by NLSM for collapsing all categories together and each individual category (“√” demotes that the region appeared in the reading network). Related to Figure 3**

|                                | Left IOG | Left MTG | Left SMG | Left Thalamus | Left OpR | Left Insula | Left TrIFG | Left MOG | Left STG | Left Caudate | Left SPL | Left IPL | Behavior-network correlation coefficient |
|--------------------------------|----------|----------|----------|---------------|----------|-------------|------------|----------|----------|--------------|----------|----------|------------------------------------------|
| <b>All categories together</b> | √        | √        | √        | √             | √        | √           | √          |          |          |              |          |          | <b>0.74</b>                              |
| <b>Fruits and vegetables</b>   | √        | √        | √        | √             | √        | √           | √          |          |          |              |          |          | <b>0.74</b>                              |
| <b>Animal</b>                  | √        | √        | √        | √             | √        | √           | √          |          |          | √            |          |          | <b>0.70</b>                              |
| <b>Famous people</b>           | √        | √        | √        | √             | √        | √           | √          |          |          |              |          |          | <b>0.69</b>                              |
| <b>Common artifacts</b>        | √        | √        |          |               | √        | √           | √          |          |          | √            | √        | √        | <b>0.72</b>                              |
| <b>Tools</b>                   | √        | √        |          |               | √        | √           |            | √        | √        |              |          |          | <b>0.70</b>                              |
| <b>Nonmanipulable objects</b>  | √        | √        | √        | √             | √        | √           | √          | √        |          |              |          |          | <b>0.71</b>                              |
| <b>Actions</b>                 | √        | √        |          |               | √        | √           |            | √        | √        |              |          |          | <b>0.76</b>                              |

Abbreviations: IOG: inferior occipital gyrus; MTG: middle temporal gyrus; SMG: supramarginal gyrus; TrIFG: triangular inferior frontal gyrus; MOG: middle occipital gyrus; OpR: Rolandic operculum; STG: superior temporal gyrus; IPL: inferior parietal lobe; SPL: superior parietal lobe).
